# Supplementary material for: Outcomes of Endovascular Therapy in Young Patients with Acute Basilar Artery Occlusion: A Substudy of BASILAR Registry Study
Source: Springer Nature journal article supplement (doi:10.1007/s40120-022-00372-6), 2022-06-16

# Supplementary Material

## Title

Outcomes of Endovascular Therapy in Young Patients with Acute Basilar Artery Occlusion:  
A Substudy of BASILAR Registry Study

## Authors and Affiliations

Jinrong Hu, MD<sup>1\*</sup>; Xing Liu, MD<sup>1\*</sup>; Shuai Liu, MD<sup>1\*</sup>; Hongfei Sang, MD<sup>1</sup>; Jiacheng Huang, MD<sup>1</sup>; Weidong Luo, MD<sup>1</sup>; Jie Wang, MS<sup>2</sup>; Zhuo Chen, MS<sup>3</sup>; Shuang Yang, MS<sup>4</sup>; Wencheng He, MS<sup>5</sup>; Bo Zhang, MS<sup>6</sup>; Zhou Yu, MS<sup>7</sup>; Shan Wang, MS<sup>8</sup>; Hongbin Wen, MD<sup>9</sup>; Xiurong Zhu, MS<sup>10</sup>; Ruidi Sun, MD<sup>1</sup>; Jie Yang, MD<sup>1</sup>; Linyu Li, MD<sup>1</sup>; Jiaxing Song, MD<sup>1</sup>; Yan Tian, MD<sup>1</sup>; Zhongming Qiu, MD<sup>11</sup>; Fengli Li, MD<sup>1,12</sup>; Wenjie Zi, MD<sup>1,12</sup>; Yaoyu Tian, MD<sup>13§</sup>; De Yang, MD<sup>1,14§</sup>

1. Department of Neurology, Xinqiao Hospital and The Second Affiliated Hospital, Army Medical University (Third Military Medical University), Chongqing 400037, China;
2. Department of Neurology, People's Hospital of Chongqing Banan District, Chongqing 400037, China;
3. Department of Neurology, Mianzhu Hospital, West China Hospital of Sichuan University, Mianzhu 618200, China;
4. Department of Neurology, People's Hospital of Zunyi City Bo Zhou District, Zunyi

563000, China;

5. Department of Neurology, GuiPing People's Hospital, GuiPing 537200, China;

6. Department of Neurology, Suining First People's Hospital, Suining 629000, China;

7. Department of Neurology, The first People's Hospital of Liangshan Yi Autonomous Prefecture, Xichang 615000, China;

8. Department of Neurology, The First Affiliated Hospital of Chongqing Medical and Pharmaceutical College, Chongqing 400000, China;

9. Department of Neurology, Xiangyang Central Hospital, Hubei Arts and Science University, Xiangyang 441100, China;

10. Department of Neurology, Chongzhou People's Hospital; Chongzhou 611200, China;

11. Department of Neurology, The 903th Hospital of The People's Liberation Army, Hangzhou 310007, China;

12. Department of Neurology, Guangyang Bay Laboratory, Chongqing Institute for Brain and Intelligence, Chongqing 400064, China;

13. Department of Neurology, Qian Xi Nan People's Hospital, Qianxinanzhou 562400, China;

14. Department of Neurology, Chongqing university fuling hospital, Fuling 408000, China.

\* Jinrong Hu, Xing Liu, and Shuai Liu contributed equally.

§Yaoyu Tian and De Yang are corresponding authors.

**Corresponding authors:**

De Yang, MD

Department of Neurology, Chongqing university fuling hospital, No. 2 Gaozhutang Road, Fuling District, Fuling 408000, China.

E-mail: Yangde3229@126.com

Yaoyu Tian, MD

Department of Neurology, Qian Xi Nan People's Hospital, No. B6 Road, Jukang Road, Jushan Office, Xingyi City, Buyi and Miao Autonomous Prefecture, Qianxinanzhou 562400, China;

E-mail: tiantaoyu123@sina.com

This appendix has been provided by the authors to give readers additional information about their work

eTable 1. Baseline characteristics stratified by favorable outcome and mortality in young patients with stroke.

eTable 2. The clinical outcome before multiple imputations during follow-up 1-year.

eTable 3. Stroke etiology in young patients (age 18-55) (n=152).

eTable 4. Predictors of clinical outcomes at 1-year in young (18-55 years) patients

eTable 5. Baseline characteristics in young females and males undergoing endovascular therapy.

eFigure 1. Distribution of the modified Rankin Scale (mRS) scores at 1-year before multiple imputations in young (aged 18–55 years) and old (aged >55 years) patients undergoing endovascular therapy.

eFigure 2. Kaplan–Meier survival estimate of cumulative mortality during the 1-year follow-up period in female versus male patients undergoing endovascular therapy.

eTable 1. Baseline characteristics stratified by favorable outcome and mortality in young patients with stroke

|                                   | 90 days           |             |                |            |            |                | 1 year            |             |                |            |            |                |
|-----------------------------------|-------------------|-------------|----------------|------------|------------|----------------|-------------------|-------------|----------------|------------|------------|----------------|
|                                   | Favorable outcome |             |                | Mortality  |            |                | Favorable outcome |             |                | mortality  |            |                |
|                                   | Favorable         | Unfavorable | <i>P</i> value | Mortality  | Survival   | <i>P</i> value | Favorable         | Unfavorable | <i>P</i> value | Mortality  | Survival   | <i>P</i> value |
| Age, median (IQR)                 | 51 (44-54)        | 50 (44-53)  | 0.45           | 51 (42-53) | 50 (44-54) | 0.67           | 50 (43-54)        | 50 (44-53)  | 0.98           | 50 (43-53) | 50 (44-54) | 0.83           |
| Male, n (%)                       | 50 (80.65)        | 71 (78.88)  | 0.79           | 51(89.47)  | 70(73.68)  | 0.02           | 53(79.10)         | 62 (80.52)  | 0.83           | 53(81.54)  | 62(78.48)  | 0.65           |
| PC-CS, median (IQR)               | 5 (4-6)           | 5 (3-6)     | 0.004          | 4 (2.5-5)  | 5 (4-6)    | 0.002          | 5 (4-6)           | 5 (3-6)     | 0.005          | 4 (3-5)    | 5 (4-6)    | 0.002          |
| Baseline NIHSS, median (IQR)      | 18 (12-28)        | 29 (22-34)  | <0.001         | 32 (27-34) | 21 (13-30) | <0.001         | 20 (12-29)        | 30 (23-34)  | <0.001         | 30 (24-34) | 21 (13-29) | <0.001         |
| pc-ASPECTS, median (IQR)          | 9 (8-10)          | 8 (6-9)     | <0.001         | 8 (6-9)    | 8 (7-10)   | <0.001         | 9 (8-10)          | 8 (7-9)     | <0.001         | 8 (7-9)    | 9 (8-10)   | <0.001         |
| Cardiovascular risk factor, n (%) |                   |             |                |            |            |                |                   |             |                |            |            |                |
| Hypertension                      | 37 (59.67)        | 53 (58.88)  | 0.92           | 36(63.16)  | 54(56.84)  | 0.44           | 38(56.72)         | 50 (64.94)  | 0.31           | 40(61.54)  | 48(60.76)  | 0.92           |
| Diabetes                          | 11 (17.74)        | 18 (20.00)  | 0.73           | 12(21.05)  | 17(17.89)  | 0.63           | 10(14.93)         | 17 (22.08)  | 0.27           | 13(20.00)  | 14(17.72)  | 0.73           |
| Atrial fibrillation               | 9 (14.52)         | 5 (5.56)    | 0.06           | 2 (3.51)   | 12(12.63)  | 0.06           | 9 (13.43)         | 4 (5.19)    | 0.09           | 4 (6.15)   | 9 (11.39)  | 0.28           |
| Smoking                           | 29(46.77)         | 41 (45.56)  | 0.88           | 29(50.89)  | 41(43.16)  | 0.36           | 32(47.76)         | 34 (44.16)  | 0.67           | 30(46.15)  | 36(45.57)  | 0.94           |
| Stroke etiology, n (%)            |                   |             | 0.25           |            |            | 0.23           |                   |             | 0.14           |            |            | 0.64           |

|                           |                   |                   |        |                   |                   |        |                   |                   |        |                   |                   |        |
|---------------------------|-------------------|-------------------|--------|-------------------|-------------------|--------|-------------------|-------------------|--------|-------------------|-------------------|--------|
| LAA                       | 39(62.90)         | 63 (70.00)        |        | 43(75.44)         | 59(62.11)         |        | 40(59.70)         | 57 (74.03)        |        | 46(70.77)         | 51(64.56)         |        |
| CE                        | 13(20.97)         | 10 (11.11)        |        | 6 (10.53)         | 17(17.89)         |        | 14(20.90)         | 8 (10.39)         |        | 8(12.31)          | 14(17.72)         |        |
| Other                     | 10(16.13)         | 17 (18.8)         |        | 8 (14.04)         | 19(20.00)         |        | 13(19.40)         | 12 (15.58)        |        | 11(16.92)         | 14(17.72)         |        |
| Occlusion sites, n (%)    |                   |                   | 0.36   |                   |                   | 0.70   |                   |                   | 0.89   |                   |                   | 0.74   |
| Distal BA                 | 22(35.48)         | 21 (23.33)        |        | 14(24.56)         | 29(30.53)         |        | 21(31.34)         | 20 (25.97)        |        | 17(26.15)         | 24(30.38)         |        |
| Middle BA                 | 16(25.81)         | 30 (33.33)        |        | 18(31.58)         | 28(29.47)         |        | 20(29.85)         | 23 (29.87)        |        | 18(27.69)         | 25(31.64)         |        |
| Proximal BA               | 9 (14.52)         | 18 (20.00)        |        | 9 (15.79)         | 18(18.95)         |        | 11(16.42)         | 15 (19.48)        |        | 12(18.46)         | 14(17.72)         |        |
| VA-V4                     | 15(24.19)         | 21 (23.33)        |        | 16(28.07)         | 20(21.05)         |        | 15(22.38)         | 19 (24.68)        |        | 18(27.69)         | 16(20.25)         |        |
| General anesthesia, n (%) | 36<br>(58.04)     | 41 (45.56)        | 0.13   | 26(45.61)         | 51(53.68)         | 0.34   | 34(50.75)         | 36(46.75)         | 0.63   | 33(50.77)         | 41(51.90)         | 0.89   |
| IVT treatment, n (%)      | 15(24.19)         | 14 (15.56)        | 0.18   | 9 (15.80)         | 20<br>(21.10)     | 0.42   | 14(20.89)         | 12 (15.58)        | 0.41   | 10(15.39)         | 16(20.25)         | 0.45   |
| OTP, median (IQR)         | 312 (240-<br>479) | 368 (229-<br>537) | 0.51   | 375 (237-<br>563) | 314 (220-<br>487) | 0.26   | 336 (252-<br>622) | 335 (207-<br>530) | 0.53   | 356 (233-<br>538) | 321 (240-<br>534) | 0.64   |
| PTR, median (IQR)         | 379 (322-<br>598) | 512 (361-<br>668) | <0.001 | 536 (375-<br>718) | 406 (311-<br>645) | <0.001 | 406 (326-<br>691) | 513 (359-<br>647) | <0.001 | 522 (365-<br>672) | 406 (320-<br>655) | <0.001 |
| Pass, median (IQR)        | 1 (1-2)           | 2 (1-2)           | <0.001 | 2 (1-3)           | 1 (1-2)           | 0.01   | 1 (1-2)           | 2 (1-2)           | 0.004  | 2 (1-3)           | 1 (1-2)           | 0.04   |

NIHSS indicates National Institutes of Health Stroke Scale; pc-ASPECTS, posterior circulation Acute Stroke Prognosis Early Computed Tomography Score; PC-CS, Posterior Circulation Collateral Score; LAA, large artery atherosclerosis; CE, cardioembolism; BA, basilar artery; VA-V4, vertebral artery-V4 segment; IVT, intravenous thrombolysis; OTP, onset to puncture time; PTR, puncture to recanalization time.

eTable 2. The clinical outcome without imputation during follow-up 1-year

| Variables         | Age18-55, y | Age>55, y  | <i>P</i> value | Unadjusted OR (95% CI) | Adjusted OR (95% CI) |
|-------------------|-------------|------------|----------------|------------------------|----------------------|
| mRS, median (IQR) | 4 (1-6)     | 6 (2-6)    | <0.001         | 1.96 (1.38-2.80)       | 2.02 (1.37-2.99)     |
| mRS 0-3           | 67(44.08)   | 152(30.77) | 0.002          | 1.82 (1.25-2.66)       | 1.92 (1.20-3.06)     |
| mRS 0-2           | (41.45)     | 127(25.71) | <0.001         | 2.10 (1.43-3.09)       | 2.29 (1.44-3.66)     |
| Mortality         | 65(42.76)   | 271(54.86) | 0.008          | 0.60 (0.42-0.88)       | 0.60 (0.39-0.94)     |

mRS indicates modified Rankin Scale; OR, odds ratio; CI, confidence interval.

eTable 3. Stroke etiology in young patients (age 18-55) (n=152)

|                                       | n=152 N (%) |
|---------------------------------------|-------------|
| Large artery atherosclerosis          | 102 (67.11) |
| cardioembolism                        | 23 (15.13)  |
| Stroke of other determined etiology   | 12 (7.89)   |
| Vessel dissection                     | 8 (5.26)    |
| vasculitis                            | 2 (1.32)    |
| Remaining causes                      | 2 (1.32)    |
| Stoke of undetermined etiology        | 15 (9.87)   |
| 2 or more possible causes             | 3 (1.97)    |
| Embolic stroke of undetermined source | 2 (1.32)    |
| Incomplete diagnostic evaluation      | 10 (6.58)   |

eTable4. Predictors of clinical outcomes at 1-year in young (18-55 years) patients

| Predictors of favorable outcome at 1-year |                           |                |                         |                |
|-------------------------------------------|---------------------------|----------------|-------------------------|----------------|
|                                           | Unadjusted OR<br>(95% CI) | <i>P</i> value | Adjusted OR<br>(95% CI) | <i>P</i> value |
| Hypertension                              | 0.75 (0.39-1.44)          | 0.39           | 0.75 (0.20- 2.89)       | 0.68           |
| Hyperlipidemia                            | 0.63 (0.33-1.20)          | 0.16           | 0.35 (0.08- 1.57)       | 0.17           |
| Diabetes                                  | 0.62 (0.27-1.42)          | 0.26           | 0.27 (0.03-2.44)        | 0.24           |
| Atrial fibrillation                       | 3.07 (0.92-10.25)         | 0.07           | 1.84 (0.19-17.87)       | 0.60           |
| mRS at 90 days                            | 0.21 (0.12-0.35)          | <0.001         | 0.19 (0.11-0.33)        | <0.001         |
| Predictors of mortality within 1-year     |                           |                |                         |                |
|                                           | Unadjusted OR<br>(95% CI) | <i>P</i> value | Adjusted OR<br>(95% CI) | <i>P</i> value |
| Hypertension                              | 1.11 (0.58-2.13)          | 0.76           | 0.36 (0.07- 1.80)       | 0.21           |
| Hyperlipidemia                            | 1.59 (0.83-3.05)          | 0.16           | 3.01 (0.64-<br>14.15)   | 0.16           |
| Diabetes                                  | 1.07 (0.48-2.42)          | 0.87           | 0.42 (0.08-2.11)        | 0.29           |
| Atrial fibrillation                       | 0.49 (0.15-1.64)          | 0.25           | 5.48 (0.36-84.55)       | 0.22           |
| mRS at 90 days                            | 11.65 (4.62-<br>29.41)    | <0.001         | 17.93 (5.68-<br>56.43)  | <0.001         |

mRS indicates modified Rankin Scale; OR, odds ratio.



eTable 5. Baseline characteristics in young females and males undergoing endovascular therapy

|                                    | Female<br>(n=31) | Male<br>(n=121)     | <i>P</i> value |
|------------------------------------|------------------|---------------------|----------------|
| Baseline NIHSS, median (IQR)       | 23 (16-30)       | 27 (16-33)          | 0.17           |
| pc-ASPECTS, median (IQR)           | 8 (7-10)         | 8 (7-10)            | 0.68           |
| PC-CS, median (IQR)                | 6 (4-6)          | 5 (3-6)             | 0.17           |
| ≥5                                 | 20 (64.52)       | 72 (59.50)          | 0.61           |
| Cardiovascular risk factors, n (%) |                  |                     |                |
| Hypertension                       | 12 (38.71)       | 78 (64.46)          | 0.009          |
| Diabetes                           | 3 (9.68)         | 26 (21.49)          | 0.14           |
| Dyslipidemia                       | 8 (25.81)        | 56 (46.28)          | 0.04           |
| Atrial fibrillation                | 7 (22.58)        | 7 (5.79)            | 0.01           |
| Smoking                            | 0                | 70 (57.85)          | <0.001         |
| Stroke etiology, n (%)             |                  |                     | 0.001          |
| LAA                                | 11 (35.48)       | 91 (75.21)          |                |
| CE                                 | 8 (25.81)        | 15 (12.40)          |                |
| Other                              | 5 (16.13)        | 7 (5.79)            |                |
| Unknown                            | 7 (22.58)        | 8 (6.61)            |                |
| Occlusion sites, n (%)             |                  |                     | 0.009          |
| Distal BA                          | 16 (51.61)       | 27 (22.31)          |                |
| Middle BA                          | 7 (22.58)        | 39 (32.23)          |                |
| Proximal BA                        | 5 (16.13)        | 22 (18.18)          |                |
| VA-V4                              | 3 (9.67)         | 33 (27.27)          |                |
| Process measure, median (IQR)      |                  |                     |                |
| OTP                                | 315 (262-425)    | 333 (223.75-590.50) | 0.57           |
| OTR                                | 417 (345-516)    | 484.5 (326-688.25)  | 0.33           |
| Clinical outcome, n (%)            |                  |                     |                |
| SICH                               | 0                | 10 (8.26)           | 0.21           |
| 90 days                            |                  |                     |                |
| mRS, median (IQR)                  | 4 (1-5)          | 5 (1-6)             | 0.23           |
| mRS 0-3                            | 12 (38.71)       | 50 (41.32)          | 0.79           |
| Mortality                          | 6 (19.35)        | 51 (42.15)          | 0.02           |
| 1-year                             |                  |                     |                |
| mRS, median (IQR)                  | 5 (1-6)          | 6 (1-6)             | 0.69           |
| mRS 0-3                            | 15 (44.10)       | 56 (46.28)          | 0.78           |
| Mortality                          | 15 (44.10)       | 69 (51.10)          | 0.47           |

IQR indicates interquartile range; NIHSS, National Institutes of Health Stroke Scale; pc-ASPECTS, posterior circulation Acute Stroke Prognosis Early Computed Tomography Score; PC-CS, Posterior Circulation Collateral Score; LAA, large artery atherosclerosis; CE, cardioembolism; BA, basilar artery; VA-V4, vertebral artery-V4 segment; OTP, onset to puncture time; OTR, onset to recanalization time; sICH, symptomatic intracranial hemorrhage; mRS indicates modified Rankin Scale.

eFigure 1. Distribution of the modified Rankin Scale (mRS) scores at 1-year before multiple imputations in young (aged 18–55 years) and old (aged >55 years) patients undergoing endovascular therapy.

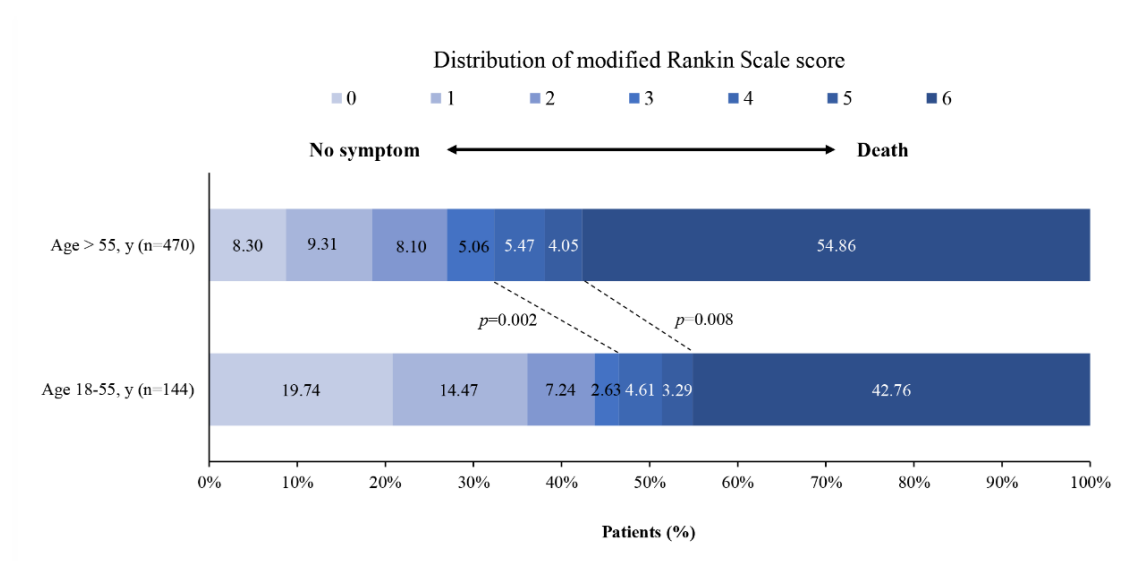

eFigure 2. Kaplan–Meier survival estimate of cumulative mortality during the 1-year follow-up period in female versus male patients undergoing endovascular therapy.

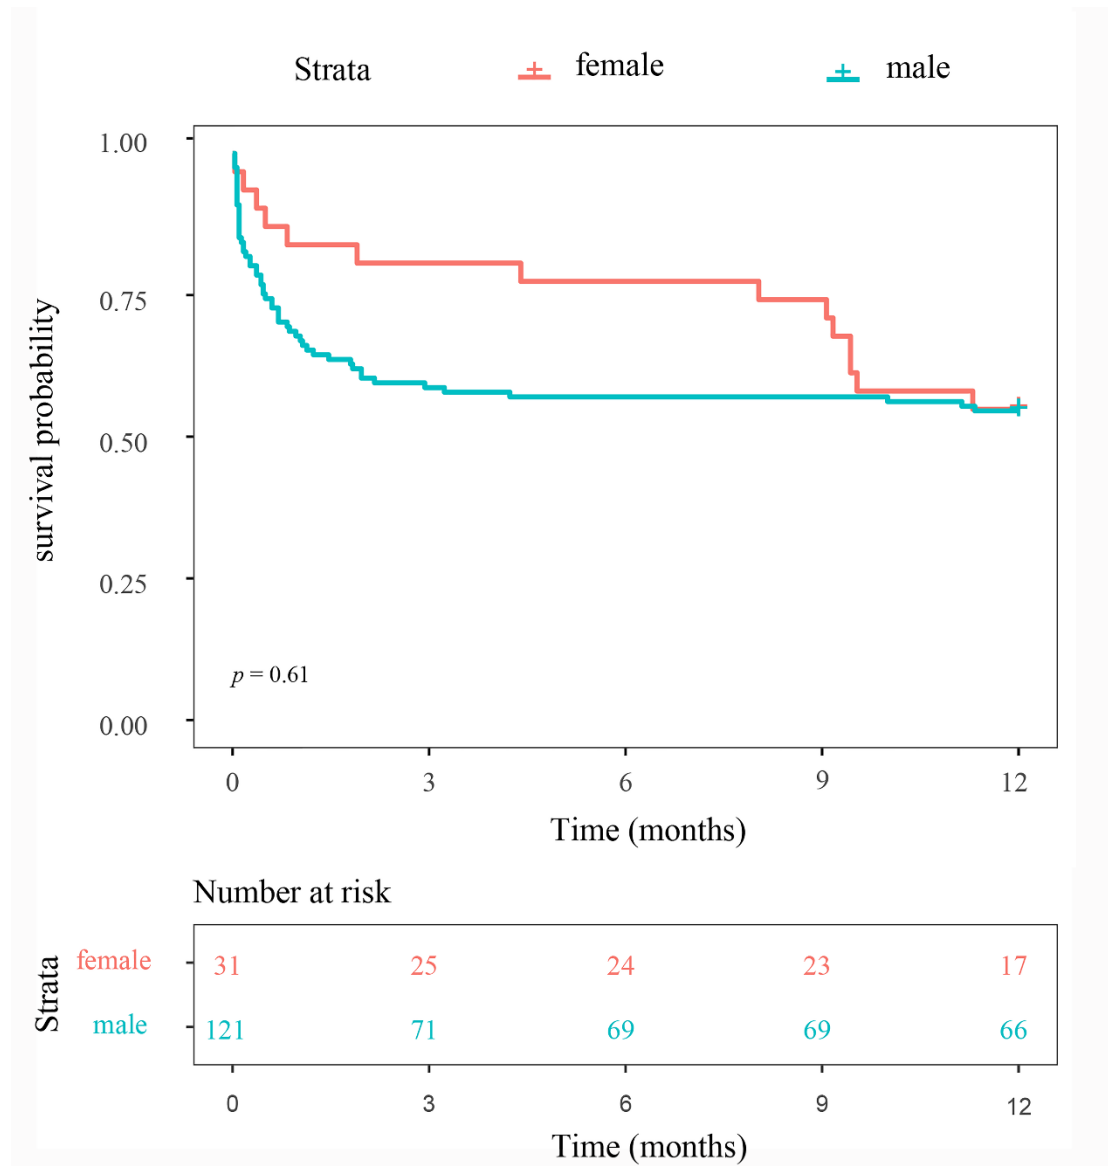

Supplement: MOESM1 [file 23172224]
